# Supplementary material for: Comparative genomic analysis of the ‘pseudofungus’ Hyphochytrium catenoides
Source: PubMed Central journal article supplement (PMC5795050; doi:10.1098/rsob.170184), 2018-01-10
Supplement: rsob170184supp4.pdf [file rsob170184supp4.pdf]

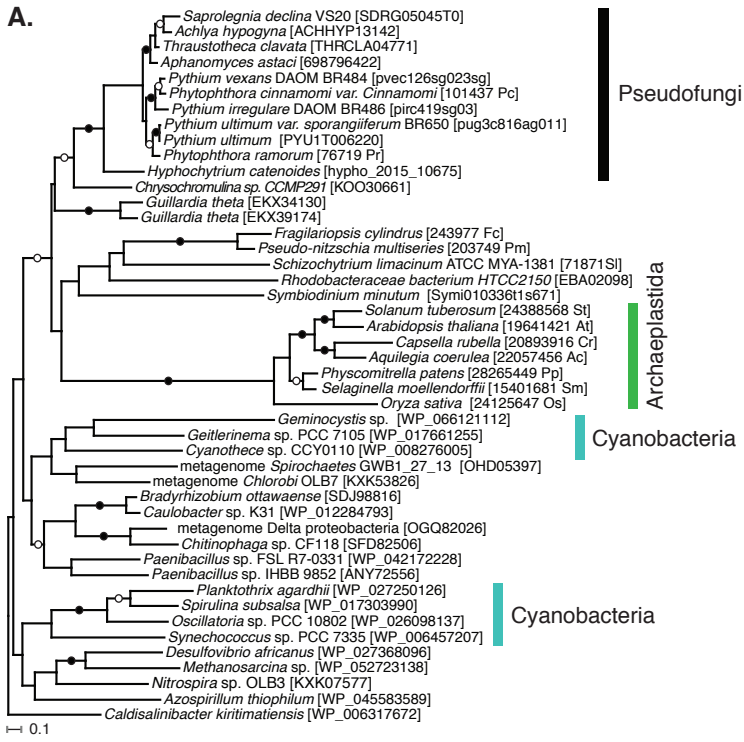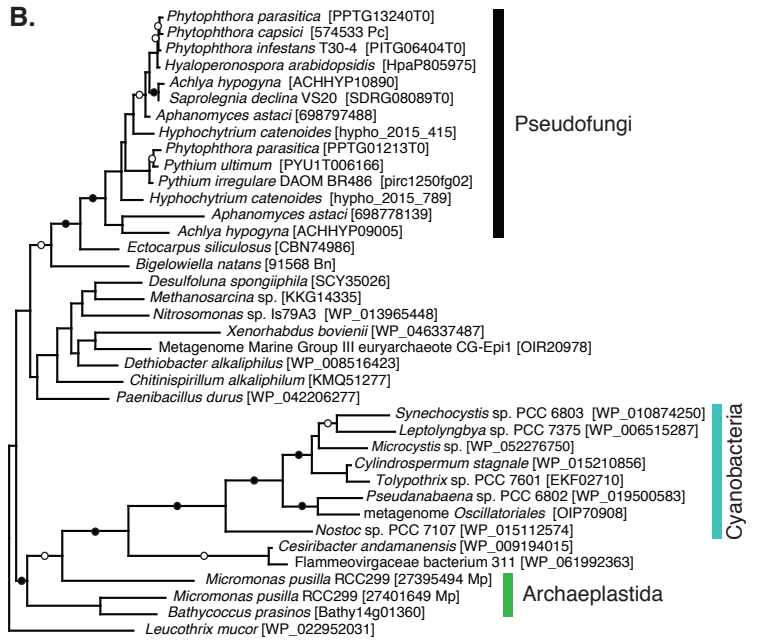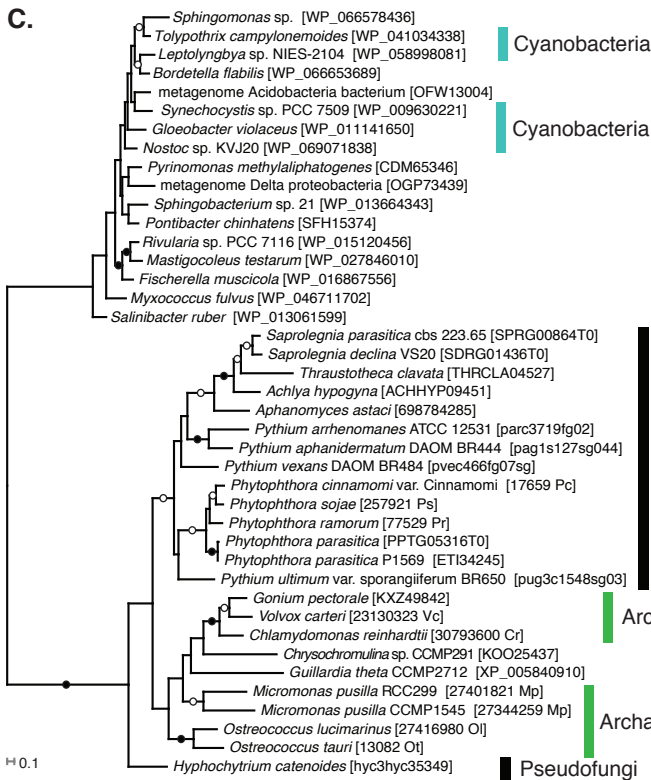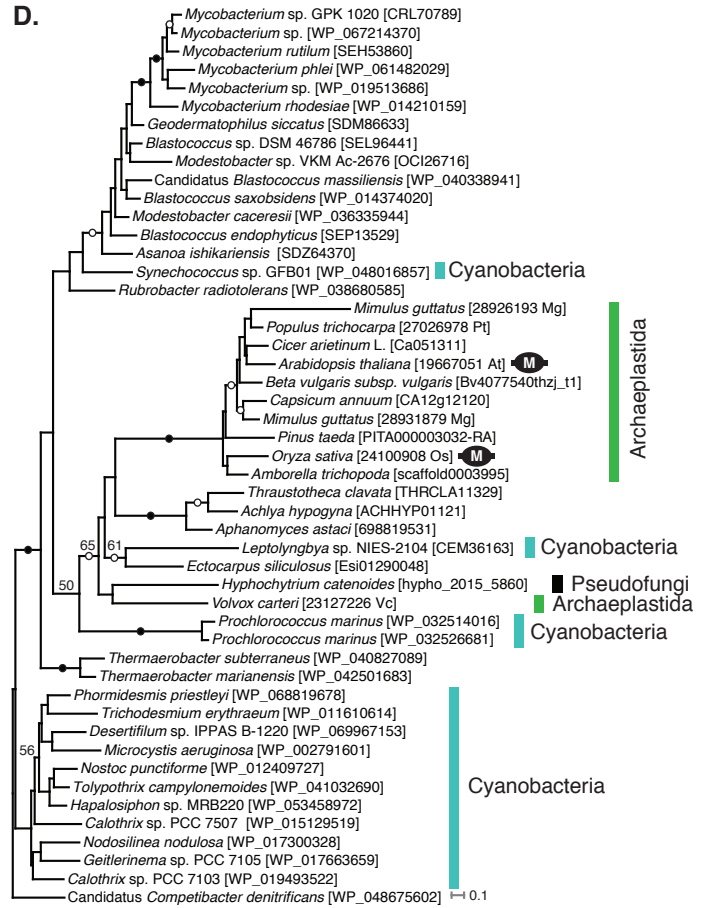

● > 90  
○ > 60

**M** TargetP = mitochondrial targeting peptide
