# Supplementary material for: Comparative genomic analysis of the ‘pseudofungus’ Hyphochytrium catenoides
Source: PubMed Central journal article supplement (PMC5795050; doi:10.1098/rsob.170184), 2018-01-10

A.

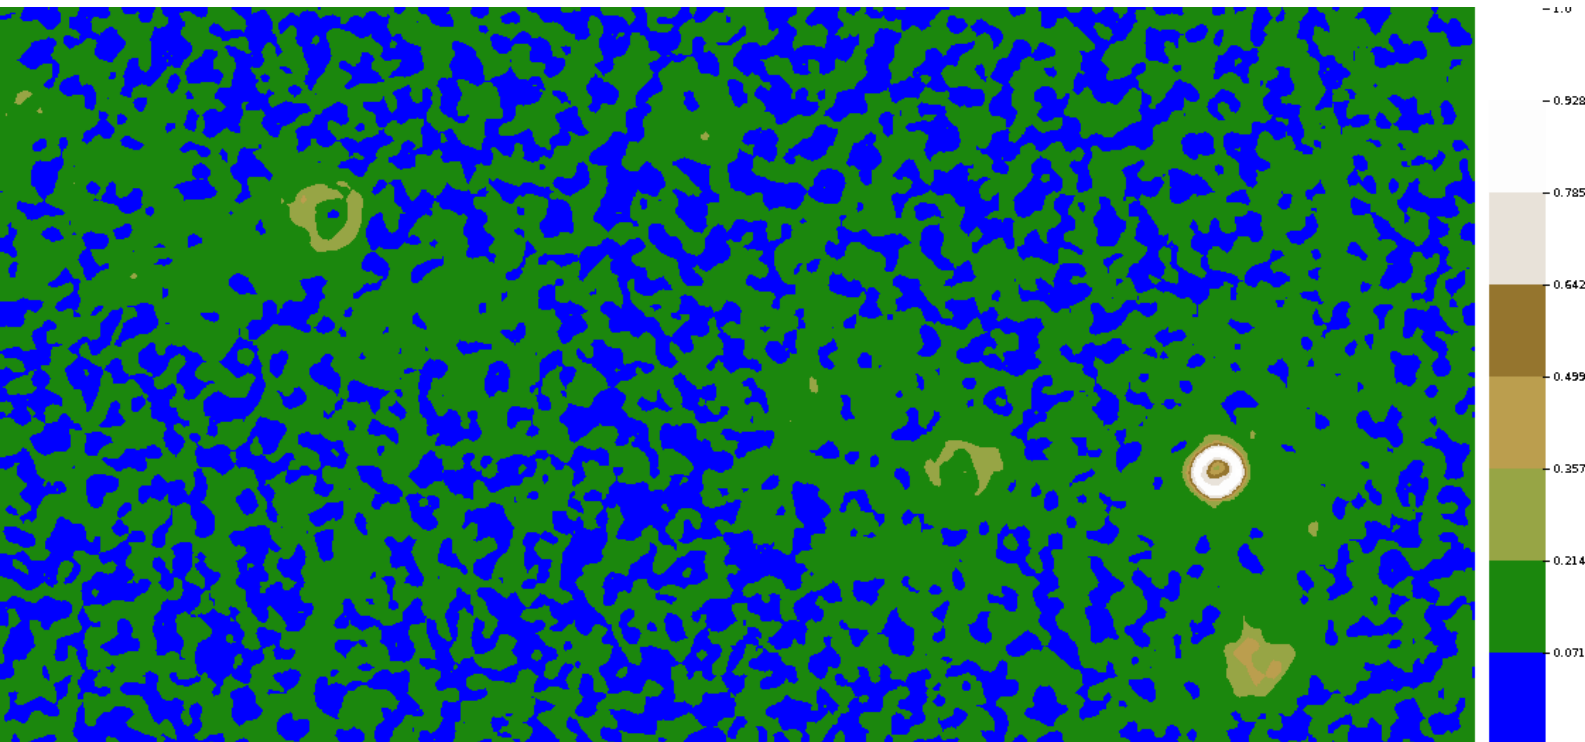

B.

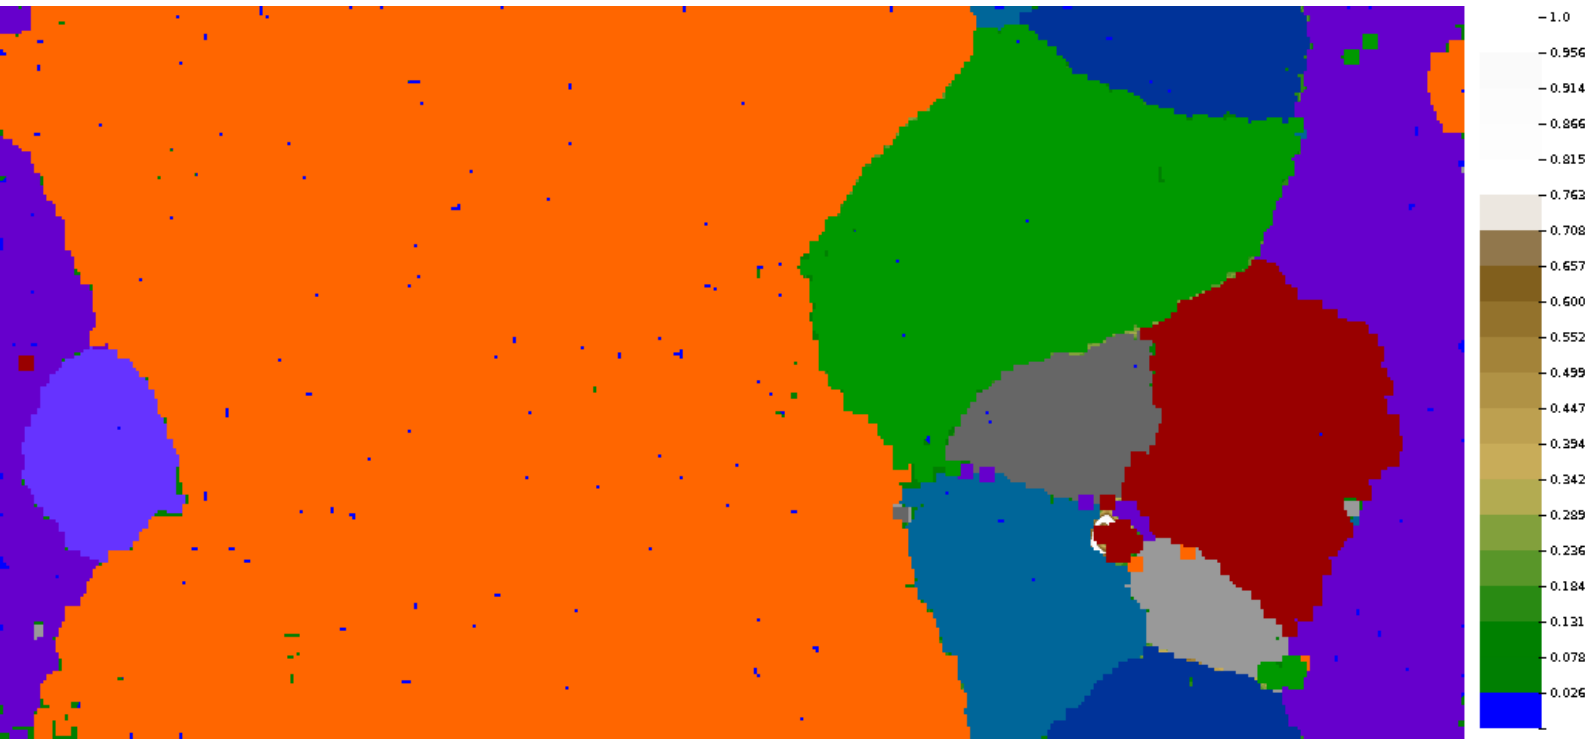

Supplement: rsob170184supp15.pdf [file rsob170184supp15.pdf]
