# Supplementary material for: Comparative genomic analysis of the ‘pseudofungus’ Hyphochytrium catenoides
Source: PubMed Central journal article supplement (PMC5795050; doi:10.1098/rsob.170184), 2018-01-10
Supplement: rsob170184supp17.pdf [file rsob170184supp17.pdf]

**Table S1. Results of reciprocal BLASTp search identifying putative homologues in *Hyphochytrium catenoides* genome of Meiosis functioning gene families (1).**

| Meiosis specific genes | Seed sequence ( <i>Homo sapiens</i> [Hs] or <i>Saccharomyces cerevisiae</i> [Sc]) | Hit in <i>Hyphochytrium catenoides</i> | Reciprocal hit         | Transcriptome      |
|------------------------|-----------------------------------------------------------------------------------|----------------------------------------|------------------------|--------------------|
| SPO11                  | AAD52562.1 ( <i>Hs</i> )                                                          | Hypho2016_00006629                     | Yes                    | Yes                |
| HOP1                   | NP_012193 ( <i>Sc</i> , weak hit for <i>Hs</i> )                                  | Hypho2016_00001841                     | Weak                   | Yes (for weak hit) |
| HOP2                   | AHZ60122 ( <i>Sc</i> , weak hit for <i>Hs</i> )                                   | Hypho2016_00004240                     | Yes                    | Yes                |
| MND1                   | NP_011332.2 ( <i>Sc</i> )                                                         | Hypho2016_00011726                     | Yes                    | Yes                |
| DMC1                   | NP_011106.1 ( <i>Sc</i> )                                                         | Hypho2016_00007211                     | Yes                    | Yes                |
| MSH4                   | NP_116652.1 ( <i>Sc</i> )                                                         | Hypho2016_00003686                     | Yes (possible paralog) | Yes                |
| MSH5                   | AAA67649.1 ( <i>Sc</i> )                                                          | Hypho2016_00005653                     | Yes                    | Yes                |

1. Ramesh MA, Malik SB, Logsdon JM, Jr. A phylogenomic inventory of meiotic genes; evidence for sex in *Giardia* and an early eukaryotic origin of meiosis. *Curr Biol.* 2005;15:185-91.
