# Supplementary material for: Comparative genomic analysis of the ‘pseudofungus’ Hyphochytrium catenoides
Source: PubMed Central journal article supplement (PMC5795050; doi:10.1098/rsob.170184), 2018-01-10
Supplement: rsob170184supp18.pdf [file rsob170184supp18.pdf]

**Table S2. Novel Domain Architectures shared across the Pseudofungi.**

| Gene Name                                                        | Domain Architecture                                                                                       | Oomycete exemplar (Accession number)         | <i>Hyphochytrium</i> homologue (Accession number) |
|------------------------------------------------------------------|-----------------------------------------------------------------------------------------------------------|----------------------------------------------|---------------------------------------------------|
| 1-phosphatidylinositol 3-phosphate 5-kinase FAB1                 | FYVE_like_SF-GAF                                                                                          | <i>Phytophthora nicotianae</i> (KUF83522)    | Hypho2016_00014879                                |
| Long-chain-fatty-acid--AMP ligase FadD29                         | FAAL-PKS_PP-BioF                                                                                          | <i>Phytophthora nicotianae</i> (KUF80336)    | Hypho2016_00002377                                |
| rhodanese domain-containing dual specificity protein phosphatase | DSPc-FYVE_like_SF- RHOD                                                                                   | <i>Phytophthora nicotianae</i> (KUF77573)    | Hypho2016_00006029                                |
| putative aminotransferase                                        | AAT_like-dihydrodipicolinate reductase                                                                    | <i>Phytophthora sojae</i> (XP_009530580)     | Hypho2016_00002138                                |
| putative callose synthase                                        | Glucan_synthase-Sugar_tr                                                                                  | <i>Phytophthora infestans</i> (XP_002998554) | Hypho2016_00001204                                |
| conserved hypothetical                                           | RING-finger-tub                                                                                           | <i>Phytophthora infestans</i> (XP_002898661) | Hypho2016_00011754                                |
| AGC/RSK/RSKP90 protein kinase                                    | PH-PH-PH-STKc_AGC                                                                                         | <i>Phytophthora infestans</i> (XP_008915041) | Hypho2016_00001388                                |
| phosphatidylinositol 3 and 4-kinase-like protein                 | PH-FYVE_scVPS27p-PI3Kc_II                                                                                 | <i>Phytophthora sojae</i> (XP_009538551)     | Hypho2016_00003770                                |
| PAX-interacting protein 1                                        | TPR_11-Prefoldin_2                                                                                        | <i>Phytophthora nicotianae</i> (KUF96058)    | Hypho2016_00008250                                |
| histidine kinase A two component receptor                        | PAS-PAS-PAS-PAS-PAS-PAS-PAS-PAS-PAS-PAS-PAS-PAS-PAS-PAS-PAS-PAS-PAS-PAS-PAS-Histidine kinase-like ATPases | <i>Phytophthora sojae</i> (XP_009526816.1)   | Hypho2016_00014859                                |
| TKL protein kinase                                               | S_TKc-DEP                                                                                                 | <i>Phytophthora parasitica</i> (ETM36095)    | Hypho2016_00016538                                |
| L-aminoadipate-semialdehyde dehydrogenase large subunit          | Abhydrolase_6-A_NRPS-SDR_e1                                                                               | <i>Phytophthora infestans</i> (XP_002905400) | Hypho2016_00000654                                |
