# Supplementary material for: Comparative genomic analysis of the ‘pseudofungus’ Hyphochytrium catenoides
Source: PubMed Central journal article supplement (PMC5795050; doi:10.1098/rsob.170184), 2018-01-10
Supplement: rsob170184supp19.pdf [file rsob170184supp19.pdf]

**Table S4. Putative orthologue families unique to Pseudofungi in comparison to other eukaryotes.**

| <b>Gene Name</b>                                                                                           | <b><i>Hyphochytrium</i> gene<br/>(Accession number)</b> | <b>Oomycete exemplar<br/>(Accession number)</b>                  | <b>Possible provenance of novel gene<br/>[and/or characteristic]</b> |
|------------------------------------------------------------------------------------------------------------|---------------------------------------------------------|------------------------------------------------------------------|----------------------------------------------------------------------|
| RCC1 repeat domain containing protein                                                                      | Hypho2016_00014105/6                                    | XP_012200151                                                     | Novel domain combination                                             |
| EF-hand domain containing protein                                                                          | Hypho2016_00009822                                      | XP_008620138.1                                                   | Novel domain combination                                             |
| Catalytic domain of AGC family Serine/Threonine Kinases (STkc_AGC) containing proteinHypho2016_00001388-RA | Hypho2016_00001388                                      | XP_009830367.1*                                                  | Novel domain combination                                             |
| VWD domain containing protein                                                                              | Hypho2016_00005547                                      | <i>Pythium</i> genome sequence<br>PYU1_G013767-201 from Ensembl. | Novel domain combination                                             |
| Ankyrin repeat and bacterial Toll-like receptor domain protein                                             | Hypho2016_00009105                                      | ETK72757                                                         | Novel domain combination                                             |
| FKBP-type peptidyl-prolyl cis-trans isomerase domain containing protein                                    | Hypho2016_00003951                                      | XP_009828623.1                                                   | Novel domain combination                                             |
| Cysteine-rich domain containing protein                                                                    | Hypho2016_00003868                                      | AIG56228                                                         | Novel protein (no similarity to non-oomycete taxa)                   |
| Conserved hypothetical protein                                                                             | Hypho2016_00005528                                      | CCI42978                                                         | Novel protein (no similarity to non-oomycete taxa)                   |
| Large eukaryotic DNA virus major capsid protein                                                            | Hypho2016_00000981                                      | ETI39689                                                         | Viral integration                                                    |

\*Also detected in domain analyses – see Table S
