# Supplementary material for: Comparative genomic analysis of the ‘pseudofungus’ Hyphochytrium catenoides
Source: PubMed Central journal article supplement (PMC5795050; doi:10.1098/rsob.170184), 2018-01-10
Supplement: rsob170184supp22.pdf [file rsob170184supp22.pdf]

**Table S6. PCR to confirm viral gene presence in the genome assembly.**

| <b>Primer</b>             | <b>Sequence (5'-3')</b> | <b>Within gene?</b>                                                     | <b>Amplicon size (bp)</b> |
|---------------------------|-------------------------|-------------------------------------------------------------------------|---------------------------|
| mg96_3prime_overlap_F1    | ATGCAACGCGGTCTATTACC    | <i>mg96</i>                                                             | 1283                      |
| mg96_3prime_overlap_R1    | GTAGGCGCTTCACTGGTCTC    | -                                                                       |                           |
| mg96_5prime_overlap_R1    | CCATATAGCAGCTTGCGTCA    | -                                                                       | 1404                      |
| mg96_5prime_overlap_F1    | CCTAAAGGGTGCCTCCTACC    | -                                                                       |                           |
| DNApolB_3prime_overlap_F1 | ATCCCAACTTTTCAGCCTCCT   | <i>DNA polB</i>                                                         | 1334                      |
| DNApolB_3prime_overlap_R1 | ACAGGAGGTGCGTCCATTAC    | <i>hypothetical</i>                                                     |                           |
| DNApolB_5prime_overlap_R1 | TTTCTCAGGACGAGGCAGTT    | <i>DNA polB</i>                                                         | 1678                      |
| DNApolB_5prime_overlap_F1 | TGGTACCATGCGACTAACCA    | <i>Predicted carbohydrate binding protein</i>                           |                           |
| MCP_Hist_3kb_F1           | AAGACTGACCTCCGCTTTCA    | <i>histone (intron)</i><br><i>[confirms integration in host genome]</i> | 2837                      |
| MCP_Hist_3kb_R1           | GCTGGATGCCTGTACCTTGT    | <i>mcp</i>                                                              |                           |
| MCP_Hist_3kb_F2           | AGATCAACGGCTCCATCTCG    | <i>hnh</i><br><i>endonuclease</i>                                       | Primer walking            |
| MCP_Hist_3kb_R2           | CTTCGATCAAACCCGCAGAG    | Between <i>hnh</i> and <i>mcp</i>                                       | Primer walking            |
| MCP_3prime_overlap_F1     | ACGCATCCAATCCTAACCAG    | <i>mcp</i>                                                              | 1299                      |
| MCP_3prime_overlap_R1     | TCCGCTTTGGAGAAGACACT    | <i>hypothetical</i>                                                     |                           |
