# Supplementary material for: Comparative genomic analysis of the ‘pseudofungus’ Hyphochytrium catenoides
Source: PubMed Central journal article supplement (PMC5795050; doi:10.1098/rsob.170184), 2018-01-10
Supplement: rsob170184supp25.pdf [file rsob170184supp25.pdf]

**Table S2. Scaffolds that could be contamination.** These 9 scaffolds total 31,406 bp

| <b>Scaffold ID</b> | <b>Bp (Coverage)</b> | <b>Primary BlastX hit (Accession number)</b>                                                              |
|--------------------|----------------------|-----------------------------------------------------------------------------------------------------------|
| FLMG01003949       | 2256 (423)           | membrane protein - <i>Thaumarchaeota archaeon</i> (WP_042686520)                                          |
| FLMG01003818       | 2142 (514)           | Amylosucrase - <i>Anaerolinaceae</i> bacterium (KUK961670)                                                |
| FLMG01003472       | 1484 (720)           | hypothetical protein - <i>Chroococcales cyanobacterium</i> (WP_045056520)                                 |
| FLMG01000834       | 3368 (406)           | Large conductance mechanosensitive channel protein MscL - <i>Thermomonospora curvata</i> (WP_012851274.1) |
| FLMG01000928       | 5162 (527)           | Amylosucrase - gammaproteobacteria bacterium NRL1                                                         |
| FLMG01003411       | 1272 (689)           | Threonine synthase - <i>Pyrinomonas methylaliphatogenes</i>                                               |
| FLMG01001818       | 6899 (332)           | Alpha-amylase - <i>Psychromonas aquimarina</i>                                                            |
| FLMG01003558       | 4080 (579)           | Aldehyde-activating protein - <i>Sinorhizobium fredii</i>                                                 |
| FLMG01000645       | 4743 (456)           | Acetyl-coenzyme A synthetase - <i>Leminorella grimontii</i>                                               |
