# Supplementary material for: Comparative genomic analysis of the ‘pseudofungus’ Hyphochytrium catenoides
Source: PubMed Central journal article supplement (PMC5795050; doi:10.1098/rsob.170184), 2018-01-10
Supplement: rsob170184supp26.pdf [file rsob170184supp26.pdf]

1 Table S3 Genomes for standard phylogenetic analyses

- 2 *Aaosphaeria arxii* CBS 175.79
- 3 *Acanthamoeba castellanii* str. Neff
- 4 *Acanthisitta chloris*
- 5 *Achlya hypogyna*
- 6 *Acidianus hospitalis* W1
- 7 *Acidilobus saccharovorans* 345-15
- 8 *Acidomyces richmondensis*
- 9 *Aciduliprofundum boonei* T469
- 10 *Acremonium alcalophilum*
- 11 *Acromyrmex echinaior*
- 12 *Acropora digitifera*
- 13 *Acyrtosiphon pisum*
- 14 *Acytostelium subglobosum*
- 15 *Aedes aegypti*
- 16 *Aegilops tauschii*
- 17 *Aeropyrum pernix* K1
- 18 *Agaricostilbum hyphaenes*
- 19 *Agaricus bisporus* var. *bisporus* H97
- 20 *Agaricus bisporus* var. *burnettii* JB137-S8
- 21 *Agrobacterium fabrum* str. C58
- 22 *Ailuropoda melanoleuca*
- 23 *Ajellomyces capsulatus* NAM1
- 24 *Ajellomyces dermatitidis* ATCC 18188
- 25 *Ajellomyces dermatitidis* ATCC 26199
- 26 *Ajellomyces dermatitidis* ER-3
- 27 *Ajellomyces dermatitidis* SLH14081
- 28 *Albugo laibachii*
- 29 *Alligator mississippiensis*
- 30 *Alligator sinensis*
- 31 *Allomyces macrogynus* atcc 38327

- 32 *Alternaria brassicicola*
- 33 *Amanita muscaria* Koide BX008
- 34 *Amanita thiersii* Skay4041
- 35 *Amborella trichopoda*
- 36 *Amniculicola lignicola* CBS 123094
- 37 *Amorphotheca resinae*
- 38 *Amphimedon queenslandica*
- 39 *Amycolatopsis mediterranei* U32
- 40 *Anas platyrhynchos*
- 41 *Angomonas deanei*
- 42 *Anolis carolinensis*
- 43 *Anopheles darlingi*
- 44 *Anopheles gambiae*
- 45 *Anthostoma avocetta* NRRL 3190
- 46 *Antonospora locustae* HM-2013
- 47 *Antrodia sinuosa*
- 48 *Apaloderma vittatum*
- 49 *Aphanomyces astaci*
- 50 *Aphanomyces invadans*
- 51 *Apiospora montagnei* NRRL 25634
- 52 *Apis dorsata*
- 53 *Apis florea*
- 54 *Apis mellifera*
- 55 *Aplanochytrium kerguelense* PBS07
- 56 *Aplosporella prunicola* CBS 121167
- 57 *Aplysia californica*
- 58 *Aptenodytes forsteri*
- 59 *Aquifex aeolicus* VF5
- 60 *Aquilegia coerulea*
- 61 *Arabidopsis halleri*
- 62 *Arabidopsis lyrata*

- 63 *Arabidopsis thaliana*
- 64 *Arachis duranensis*
- 65 *Arachis ipaensis*
- 66 *Archaeoglobus fulgidus* DSM 4304
- 67 archaeon Loki
- 68 *Armillaria mellea* DSM 3731
- 69 *Arthrobotrys oligospora* ATCC 24927
- 70 *Arthroderma benhamiae* CBS 112371
- 71 *Artomyces pyxidatus*
- 72 *Ascaris suum*
- 73 *Ascobolus immersus* RN42
- 74 *Ascocoryne sarcoides* NRRL50072
- 75 *Ascoidea rubescens* NRRL Y17699
- 76 *Ashbya gossypii* ATCC 10895
- 77 *Aspergillus acidus*
- 78 *Aspergillus aculeatus* ATCC 16872
- 79 *Aspergillus brasiliensis*
- 80 *Aspergillus carbonarius* ITEM 5010
- 81 *Aspergillus clavatus* NRRL 1
- 82 *Aspergillus flavus* NRRL3357
- 83 *Aspergillus fumigatus* A1163
- 84 *Aspergillus fumigatus* Af293
- 85 *Aspergillus glaucus*
- 86 *Aspergillus kawachii* IFO 4308
- 87 *Aspergillus nidulans*
- 88 *Aspergillus niger* ATCC 1015
- 89 *Aspergillus niger* CBS 513.88
- 90 *Aspergillus niger* NRRL3
- 91 *Aspergillus oryzae* RIB40
- 92 *Aspergillus sydowii*
- 93 *Aspergillus terreus* FGSC A1156

- 94 *Aspergillus terreus* NIH2624
- 95 *Aspergillus tubingensis*
- 96 *Aspergillus versicolor*
- 97 *Aspergillus wentii*
- 98 *Aspergillus zonatus*
- 99 *Asterochloris* sp. Cgr\_DA1phos
- 100 *Astyanax mexicanus*
- 101 *Atractiellales* sp. 95
- 102 *Atta cephalotes*
- 103 *Aulographum hederæ*
- 104 *Aurantiochytrium limacinum*
- 105 *Aureobasidium pullulans*
- 106 *Aureobasidium pullulans* var. *melanogenum*
- 107 *Aureobasidium pullulans* var. *namibiae*
- 108 *Aureobasidium pullulans* var. *pullulans* EXF-150
- 109 *Aureobasidium pullulans* var. *subglaciale* EXF-2481
- 110 *Aureococcus anophagefferens*
- 111 *Auricularia subglabra*
- 112 *Azadirachta indica*
- 113 *Azotobacter vinelandii* CA
- 114 *Azotobacter vinelandii* DJ
- 115 *Babesia bovis*
- 116 *Babesia equi* strain WA
- 117 *Babesia microti*
- 118 *Babjeviella inositovora* NRRL Y-12698
- 119 *Bacillus anthracis* str. Ames
- 120 *Bacillus anthracis* str. Sterne
- 121 *Bacillus cereus* ATCC 14579
- 122 *Bacillus subtilis* subsp. *subtilis* str. 168
- 123 *Bacillus thuringiensis* serovar *konkukian* str. 97-27
- 124 *Backusella circina* FSU 941

- 125 *Bacteroides thetaiotaomicron* VPI-5482
- 126 *Bactrocera cucurbitae*
- 127 *Bactrocera dorsalis*
- 128 *Balaenoptera acutorostrata scammoni*
- 129 *Balearica regulorum gibbericeps*
- 130 *Bathycoccus prasinus*
- 131 *Batrachochytrium dendrobatidis* JAM81
- 132 *Baudoinia compniacensis* UAMH 10762
- 133 *Beauveria bassiana* ARSEF 2860
- 134 *Beta vulgaris* subsp. *vulgaris*
- 135 *Bifidobacterium longum* NCC2705
- 136 *Bigelowiella natans*
- 137 *Bison bison bison*
- 138 *Bjerkandera adusta*
- 139 *Blastocladiella emersonii*
- 140 *Blastocystis hominis*
- 141 *Blumeria graminis*
- 142 *Bodo saltans*
- 143 *Boechera stricta*
- 144 *Boletus edulis*
- 145 *Bombus impatiens*
- 146 *Bombus terrestris*
- 147 *Bombyx mori*
- 148 *Bordetella pertussis* Tohama I
- 149 *Borrelia burgdorferi* B31
- 150 *Bos grunniens*
- 151 *Bos mutus*
- 152 *Bos taurus*
- 153 *Botryobasidium botryosum*
- 154 *Botryosphaeria dothidea*
- 155 *Botryotinia fuckeliana*

- 156 *Botrytis cinerea* T4
- 157 *Brachypodium distachyon*
- 158 *Bradyrhizobium diazoefficiens* USDA 110
- 159 *Branchiostoma floridae*
- 160 *Brassica oleracea* var. *oleracea*
- 161 *Brassica rapa*
- 162 *Brugia malayi*
- 163 *Bubalus bubalis*
- 164 *Buceros rhinoceros silvestris*
- 165 *Burkholderia cenocepacia*
- 166 *Burkholderia dolosa*
- 167 *Burkholderia pseudomallei* K96243
- 168 *Bursaphelenchus xylophilus*
- 169 *Cadophora* sp. DSE1049
- 170 *Caenorhabditis brenneri*
- 171 *Caenorhabditis briggsae*
- 172 *Caenorhabditis elegans*
- 173 *Caenorhabditis japonica*
- 174 *Caenorhabditis remanei*
- 175 *Cajanus cajan*
- 176 *Calcarisporiella thermophila*
- 177 *Caldisphaera lagunensis* DSM 15908
- 178 *Caldivirga maquilingensis* IC-167
- 179 *Calliarthron tuberculosum*
- 180 *Callithrix jacchus*
- 181 *Callorhinchus milii*
- 182 *Calocera cornea*
- 183 *Calocera viscosa*
- 184 *Calypte anna*
- 185 *Camelina sativa*
- 186 *Camelus bactrianus*

187 *Camelus dromedarius*  
188 *Camelus ferus*  
189 *Camponotus floridanus*  
190 *Campylobacter jejuni* subsp. *jejuni* NCTC 11168 = ATCC 700819  
191 *Candida albicans* sc5314  
192 *Candida albicans* WO-1  
193 *Candida arabinof fermentans* NRRL YB-2248  
194 *Candida caseinolytica* NRRL Y-17796  
195 *Candida dubliniensis* CD36  
196 *Candida glabrata*  
197 *Candida guilliermondii*  
198 *Candida lusitaniae*  
199 *Candida orthopsilosis*  
200 *Candida parapsilosis*  
201 *Candida tanzawaensis* NRRL Y-17324  
202 *Candida tenuis* NRRL Y-1498  
203 *Candida tropicalis*  
204 *Candidatus Caldiarchaeum subterraneum*  
205 *Candidatus Korarchaeum cryptofilum* OPF8  
206 *Candidatus Micrarchaeum acidiphilum* ARMAN-2  
207 *Candidatus Nanosalina* sp. J07AB43  
208 *Candidatus Nanosalinarum* sp. J07AB56  
209 *Candidatus Nitrosopelagicus brevis*  
210 *Candidatus Parvarchaeum acidophilus*  
211 *Canis familiaris*  
212 *Capitella teleta*  
213 *Capra hircus*  
214 *Caprimulgus carolinensis*  
215 *Capronia coronata* CBS 617.96  
216 *Capronia epimyces* CBS 606.96  
217 *Capsaspora owczarzaki*

218 *Capsella grandiflora*  
219 *Capsella rubella*  
220 *Capsicum annuum*  
221 *Capsicum annuum* L.  
222 *Capsicum annuum* var. *glabriusculum*  
223 *Cariama cristata*  
224 *Carica papaya*  
225 *Castanea mollissima*  
226 *Catenaria anguillulae* PL171  
227 *Catharanthus roseus*  
228 *Cathartes aura*  
229 *Caulobacter crescentus* CB15  
230 *Cavia porcellus*  
231 *Cenarchaeum symbiosum* A  
232 *Cenococcum geophilum* 1.58  
233 *Cerapachys biroi*  
234 *Ceratitis capitata*  
235 *Ceratotherium simum*  
236 *Cercospora zeae-maydis*  
237 *Ceriporiopsis subvermispora* B  
238 *Cerrena unicolor*  
239 *Chaetomium globosum*  
240 *Chaetomium thermophilum*  
241 *Chaetura pelagica*  
242 *Chalara longipes* BDJ  
243 *Charadrius vociferus*  
244 *Chelonia mydas*  
245 *Chinchilla lanigera*  
246 *Chlamydia trachomatis* 434\_Bu  
247 *Chlamydomonas reinhardtii*  
248 *Chlamydophila pneumoniae* CWL029



- 249 *Chlamydotis undulata macqueenii*
- 250 *Chlorella variabilis* NC64A
- 251 *Chlorella vulgaris* C-169
- 252 *Chlorobium tepidum* TLS
- 253 *Chlorocephus sabaeus*
- 254 *Chloroflexus aurantiacus* J-10-fl
- 255 *Choiromyces venosus* 120613-1
- 256 *Choloepus hoffmanni*
- 257 *Chondrus crispus*
- 258 *Chromera velia* CCMP2878
- 259 *Chrysemys picta bellii*
- 260 *Chrysochloris asiatica*
- 261 *Cicer arietinum*
- 262 *Cicer arietinum* L.
- 263 *Ciona intestinalis*
- 264 *Ciona savignyi*
- 265 *Citrullus lanatus*
- 266 *Citrullus lanatus* subsp. *Vulgaris*
- 267 *Citrus clementina*
- 268 *Citrus sinensis*
- 269 *Cladonia grayi*
- 270 *Cladophialophora carrionii* CBS 160.54
- 271 *Cladophialophora psammophila* CBS 110553
- 272 *Cladophialophora yegresii* CBS 114405
- 273 *Cladosporium fulvum*
- 274 *Clonorchis sinensis*
- 275 *Clostridium acetobutylicum* ATCC 824
- 276 *Clostridium botulinum* A str. Hall
- 277 *Clostridium difficile* 630
- 278 *Coccidioides immitis* H538.4
- 279 *Coccidioides immitis* RMSCC 2394

280 *Coccidioides immitis* RMSCC 3703  
281 *Coccidioides immitis* RS  
282 *Coccidioides posadasii* C735 delta SOWgp  
283 *Coccidioides posadasii* RMSCC 3488  
284 *Coccidioides posadasii* Silveira  
285 *Cochliobolus carbonum* 26-R-13  
286 *Cochliobolus heterostrophus* C4  
287 *Cochliobolus heterostrophus* C5  
288 *Cochliobolus lunatus* m118  
289 *Cochliobolus miyabeanus* ATCC 44560  
290 *Cochliobolus sativus* ND90Pr  
291 *Cochliobolus victoriae* FI3  
292 *Coemansia reversa* NRRL 1564  
293 *Colius striatus*  
294 *Colletotrichum gloeosporioides* Nara gc5  
295 *Colletotrichum higginsianum* IMI 349063  
296 *Colletotrichum orbiculare* MAFF 240422  
297 *Columba livia*  
298 *Condylura cristata*  
299 *Conidiobolus coronatus* NRRL 28638  
300 *Coniochaeta ligniaria*  
301 *Coniophora puteana*  
302 *Coniosporium apollinis* CBS 100218  
303 *Coprinopsis cinerea*  
304 *Coprinopsis cinerea* AmutBmut pab1-1  
305 *Cordyceps militaris* CM01  
306 *Cortinarius glaucopus* AT 2004 276  
307 *Corvus brachyrhynchos*  
308 *Corvus cornix cornix*  
309 *Corynebacterium glutamicum* ATCC 13032  
310 *Corynespora cassiicola* Philippines

- 311 *Coxiella burnetii* RSA 493
- 312 *Crassostrea gigas*
- 313 *Cricetulus griseus*
- 314 *Cronartium quercuum* f. sp. fusiforme G11
- 315 *Cryphonectria parasitica* EP155
- 316 *Cryptococcus gattii* R265
- 317 *Cryptococcus gattii* WM276
- 318 *Cryptococcus neoformans* var. *grubii* H99
- 319 *Cryptococcus neoformans* var. *neoformans* B-3501A
- 320 *Cryptococcus neoformans* var. *neoformans* JEC21
- 321 *Cryptococcus vishniacii*
- 322 *Cryptosporidium hominis*
- 323 *Cryptosporidium muris*
- 324 *Cryptosporidium parvum*
- 325 *Cuculus canorus*
- 326 *Cucumis melo* L.
- 327 *Cucumis sativus*
- 328 *Cucurbitaria berberidis* CBS 394.84
- 329 *Culex quinquefasciatus*
- 330 *Cyanidioschyzon merolae*
- 331 *Cyanophora paradoxa*
- 332 *Cyberlindnera jadinii* NRRL Y-1542
- 333 *Cylindrobasidium torrendii*
- 334 *Cynoglossus semilaevis*
- 335 *Dacryopinax* sp. DJM-731 SS1
- 336 *Daedalea quercina*
- 337 *Daldinia eschscholzii*
- 338 *Danaus plexippus*
- 339 *Danio rerio*
- 340 *Daphnia pulex*
- 341 *Dasypus novemcinctus*

- 342 *Debaryomyces hansenii*
- 343 *Deinococcus radiodurans* R1
- 344 *Dekkera bruxellensis* CBS 2499
- 345 *Delitschia confertaspora* ATCC 74209
- 346 *Dendroctonus ponderosae*
- 347 *Dendrothele bispora* CBS 962.96
- 348 *Desulfovibrio vulgaris* str. Hildenborough
- 349 *Desulfurococcus fermentans* DSM 16532
- 350 *Diaphorina citri*
- 351 *Dichomitus squalens*
- 352 *Dictyoglomus turgidum* DSM 6724
- 353 *Dictyostelium discoideum*
- 354 *Dictyostelium fasciculatum*
- 355 *Dictyostelium purpureum*
- 356 *Didymella exigua* CBS 183.55
- 357 *Dioszegia cryoxerica*
- 358 *Dipodomys ordii*
- 359 *Dissoconium aciculare*
- 360 *Dothidotthia symphoricarpi*
- 361 *Dothistroma septosporum* NZE10
- 362 *Drosophila ananassae*
- 363 *Drosophila erecta*
- 364 *Drosophila grimshawi*
- 365 *Drosophila melanogaster*
- 366 *Drosophila mojavensis*
- 367 *Drosophila persimilis*
- 368 *Drosophila pseudoobscura*
- 369 *Drosophila sechellia*
- 370 *Drosophila simulans*
- 371 *Drosophila virilis*
- 372 *Drosophila willistoni*

- 373 *Drosophila yakuba*
- 374 *Echinococcus granulosus*
- 375 *Echinococcus multilocularis*
- 376 *Echinops telfairi*
- 377 *Ectocarpus siliculosus*
- 378 *Edhazardia aedis*
- 379 *Egretta garzetta*
- 380 *Eimeria acervulina*
- 381 *Eimeria brunetti*
- 382 *Eimeria maxima*
- 383 *Eimeria mitis*
- 384 *Eimeria necatrix*
- 385 *Eimeria praecox*
- 386 *Eimeria tenella*
- 387 *Elaeis guineensis*
- 388 *Elephantulus edwardii*
- 389 *Emiliana huxleyi* CCMP1516
- 390 *Encephalitozoon cuniculi* GB-M1
- 391 *Encephalitozoon hellem* ATCC 50504
- 392 *Encephalitozoon intestinalis* ATCC 50506
- 393 *Encephalitozoon romaleae* SJ-2008
- 394 *Entamoeba dispar*
- 395 *Entamoeba histolytica*
- 396 *Entamoeba histolytica* KU27
- 397 *Entamoeba invadens*
- 398 *Entamoeba nuttalli*
- 399 *Enterobacter cloacae* subsp. *cloacae* ATCC 13047
- 400 *Enterococcus faecalis* V583
- 401 *Enterocytozoon bieneusi* H348
- 402 *Eptesicus fuscus*
- 403 *Equus caballus*

404 *Equus przewalskii*  
405 *Eremothecium cymbalariae*  
406 *Erinaceus europaeus*  
407 *Escherichia coli* IAI39  
408 *Escherichia coli* O104 H4 str. 2011C-3493  
409 *Escherichia coli* O157 H7 str. Sakai  
410 *Escherichia coli* O83 H1 str. NRG 857C  
411 *Escherichia coli* str. K-12 substr. MG1655  
412 *Escherichia coli* UMN026  
413 *Esox lucius*  
414 *Eucalyptus grandis*  
415 *Eurotium rubrum*  
416 *Eurypyga helias*  
417 *Eutrema parvulum*  
418 *Eutrema salsugineum*  
419 *Eutypa lata* UCREL1  
420 *Exidia glandulosa*  
421 *Exobasidium vaccinii* MPITM  
422 *Exophiala aquamarina* CBS 119918  
423 *Exophiala dermatitidis*  
424 *Falco cherrug*  
425 *Falco peregrinus*  
426 *Felis catus*  
427 *Ferroglobus placidus* DSM 10642  
428 *Ferroplasma acidarmanus* fer1  
429 *Fervidicoccus fontis* Kam940  
430 *Fibroporia radiculosa* TFFH 294  
431 *Fibulorhizoctonia* sp. CBS 109695  
432 *Ficedula albicollis*  
433 *Fistulina hepatica*  
434 *Flavobacterium psychrophilum* JIP02\_86

435 *Fomitiporia mediterranea*  
436 *Fomitopsis pinicola* FP-58527 SS1  
437 *Fonticula alba*  
438 *Fopius arisanus*  
439 *Fragaria vesca*  
440 *Fragilariopsis cylindrus*  
441 *Francisella tularensis* subsp. *tularensis* SCHU S4  
442 *Fukomys damarensis*  
443 *Fulmarus glacialis*  
444 *Fusarium fujikuroi*  
445 *Fusarium fujikuroi* IMI 58289  
446 *Fusarium graminearum* PH-1  
447 *Fusarium oxysporum* f. sp. *melonis*  
448 *Fusarium oxysporum* Fo47  
449 *Fusarium oxysporum* FOL 4287  
450 *Fusarium oxysporum* NRRL 32931  
451 *Fusarium pseudograminearum* CS3096  
452 *Fusarium verticillioides* 7600  
453 *Fusobacterium nucleatum* subsp. *nucleatum* ATCC 25586  
454 *Gadus morhua*  
455 *Gaeumannomyces graminis* var. *tritici* R3-111a-1  
456 *Galdieria sulphuraria*  
457 *Galeopterus variegatus*  
458 *Galerina marginata*  
459 *Gallus gallus*  
460 *Ganoderma* sp. 10597 SS1  
461 *Gasterosteus aculeatus*  
462 *Gavia stellata*  
463 *Genlisea aurea*  
464 *Geobacter sulfurreducens* PCA  
465 *Geomyces destructans*

466 *Geospiza fortis*  
467 *Giardia intestinalis*  
468 *Giardia lamblia*  
469 *Gibberella zeae*  
470 *Glarea lozoyensis* ATCC 20868  
471 *Gloeobacter violaceus* PCC 7421  
472 *Gloeophyllum trabeum*  
473 *Glomerella acutata*  
474 *Glomerella cingulata*  
475 *Glomerella graminicola*  
476 *Glycine max*  
477 *Gonapodya prolifera*  
478 *Gorilla gorilla*  
479 *Gossypium hirsutum*  
480 *Gossypium raimondii*  
481 *Gregarina niphandrodes*  
482 *Grosmannia clavigera* kw1407  
483 *Guillardia theta*  
484 *Gymnascella aurantiaca*  
485 *Gymnascella citrina*  
486 *Gymnopilus chrysopellus* PR-1187  
487 *Gymnopus luxurians*  
488 *Gyrodon lividus* BX  
489 *Haemophilus influenzae* Rd KW20  
490 *Halalkalicoccus jeotgali* B3  
491 *Haliaeetus albicilla*  
492 *Haliaeetus leucocephalus*  
493 *Haloarcula hispanica* ATCC 33960  
494 *Halobacterium salinarum* R1  
495 *Haloferax mediterranei* ATCC 33500  
496 *Halogeometricum borinquense* DSM 11551



497 Halomicrobium mukohataei DSM 12286  
498 Halopiger xanaduensis SH-6  
499 Haloquadratum walsbyi DSM 16790  
500 Halorhabdus utahensis DSM 12940  
501 Halorubrum lacusprofundi ATCC 49239  
502 Haloterrigena turkmenica DSM 5511  
503 Halovivax ruber XH-70  
504 Hammondia hammondi  
505 Hanseniaspora valbyensis NRRL Y-1626  
506 Haplochromis burtoni  
507 Harpegnathos saltator  
508 Hebeloma cylindrosporum h7  
509 Helicobacter pylori 26695  
510 Heliconius melpomene  
511 Helobdella robusta  
512 Heterobasidion annosum  
513 Heterocephalus glaber  
514 Heterogastrium pycnidioideum ATCC MYA-4631  
515 Histoplasma capsulatum  
516 Homo sapiens  
517 Homolaphlyctis polyrhiza JEL 142  
518 Hordeum vulgare  
519 Hyaloperonospora arabidopsidis  
520 Hydnum ericetorum  
521 Hydra magnipapillata  
522 Hydra vulgaris  
523 Hymenolepis microstoma  
524 Hyperthermus butylicus DSM 5456  
525 Hyphochytrium catenoides  
526 Hyphochytrium catenoides old  
527 Hypholoma sublateritium

528 *Hyphopichia burtonii* NRRL Y-1933  
529 *Hypoxylon* sp. CI-4A  
530 *Hypoxylon* sp. CO27-5  
531 *Hypoxylon* sp. EC38  
532 *Hysterium pulicare*  
533 *Ichthyophthirius multifiliis*  
534 *Ictidomys tridecemlineatus*  
535 *Ignicoccus hospitalis* KIN4\_I  
536 *Ignisphaera aggregans* DSM 17230  
537 *Ilyonectria radicola*  
538 *Ixodes scapularis*  
539 *Jaapia argillacea*  
540 *Jaculus jaculus*  
541 *Jatropha curcas*  
542 *Karstenula rhodostoma* CBS 690.94  
543 *Kazachstania africana*  
544 *Kazachstania naganishii*  
545 *Ketogulonicigenium vulgare* WSH-001  
546 *Klebsiella pneumoniae* subsp. *pneumoniae* HS11286  
547 *Klebsormidium flaccidum*  
548 *Kluyveromyces lactis*  
549 *Komagataella pastoris*  
550 *Laccaria amethystina* LaAM-08-1  
551 *Laccaria bicolor*  
552 *Lachancea kluyveri*  
553 *Lachancea thermotolerans*  
554 *Lachancea waltii*  
555 *Lactobacillus acidophilus* NCFM  
556 *Lactobacillus plantarum* WCFS1  
557 *Lactobacillus salivarius* UCC118  
558 *Lactococcus lactis* subsp. *lactis* Il1403

559 *Laetiporus sulphureus* var. *sulphureus*  
560 *Larimichthys crocea*  
561 *Latimeria chalumnae*  
562 *Leersia perrieri*  
563 *Leishmania braziliensis*  
564 *Leishmania donovani*  
565 *Leishmania infantum*  
566 *Leishmania major*  
567 *Leishmania mexicana*  
568 *Leishmania panamensis*  
569 *Lentinus tigrinus*  
570 *Lentinus tigrinus* ALCF2SS1-6  
571 *Lentinus tigrinus* ALCF2SS1-7  
572 *Lentithecium fluviatile*  
573 *Lepidopterella palustris*  
574 *Lepisosteus oculatus*  
575 *Leptonychotes weddellii*  
576 *Leptosomus discolor*  
577 *Leptosphaeria maculans*  
578 *Leucoagaricus gongylophorus* Ac12  
579 *Leucogyrophana mollusca*  
580 *Lichtheimia corymbifera*  
581 *Lichtheimia hyalospora*  
582 *Linum usitatissimum*  
583 *Lipomyces starkeyi* NRRL Y-11557  
584 *Lipotes vexillifer*  
585 *Listeria monocytogenes* EGD-e  
586 *Loa loa*  
587 *Lodderomyces elongisporus*  
588 *Lophiostoma macrostomum*  
589 *Lophium mytilinum* CBS 269.34

590 *Lottia gigantea*  
591 *Lotus japonicus*  
592 *Loxodonta africana*  
593 *Lytechinus variegatus*  
594 *Macaca fascicularis*  
595 *Macaca mulatta*  
596 *Macrolepiota fuliginosa*  
597 *Macrophomina phaseolina* MS6  
598 *Macropus eugenii*  
599 *Macroventuria anomochaeta* CBS 525.71  
600 *Magnaporthe grisea*  
601 *Magnaporthe poae* ATCC 64411  
602 *Malassezia globosa*  
603 *Malassezia sympodialis* ATCC 42132  
604 *Malbranchea cinnamomea*  
605 *Malus domestica*  
606 *Manacus vitellinus*  
607 *Manihot esculenta*  
608 *Mastigamoeba balamuthi*  
609 *Maylandia zebra*  
610 *Medicago truncatula*  
611 *Megachile rotundata*  
612 *Megaselia scalaris*  
613 *Melampsora laricis-populina*  
614 *Melanconium* sp. NRRL 54901  
615 *Melanomma pulvis-pyrius*  
616 *Meleagris gallopavo*  
617 *Meliniomyces bicolor* E  
618 *Meliniomyces variabilis* F  
619 *Melitaea cinxia*  
620 *Melopsittacus undulatus*

621 *Merops nubicus*  
622 *Mesitornis unicolor*  
623 *Mesocricetus auratus*  
624 *Metallosphaera sedula* DSM 5348  
625 *Metarhizium acridum* CQMa 102  
626 *Metarhizium robertsii*  
627 *Metaseiulus occidentalis*  
628 *Methanobacterium formicicum* DSM 3637  
629 *Methanobrevibacter ruminantium* M1  
630 *Methanobrevibacter* sp. AbM4  
631 *Methanocaldococcus fervens* AG86  
632 *Methanocella conradii* HZ254  
633 *Methanococcoides burtonii* DSM 6242  
634 *Methanococcus maripaludis* S2  
635 *Methanocorpusculum labreanum* Z  
636 *Methanoculleus bourgensis* MS2  
637 *Methanofollis liminatans* DSM 4140  
638 *Methanohalobium evestigatum* Z-7303  
639 *Methanohalophilus mahii* DSM 5219  
640 *Methanolobus psychrophilus* R15  
641 *Methanomethylovorans hollandica* DSM 15978  
642 *Methanoplanus limicola* DSM 2279  
643 *Methanopyrus kandleri* AV19  
644 *Methanoregula formicicum* SMSP  
645 *Methanosaeta thermophila* PT  
646 *Methanosalsum zhilinae* DSM 4017  
647 *Methanosarcina acetivorans* C2A  
648 *Methanosphaera stadtmanae* DSM 3091  
649 *Methanosphaerula palustris* E1-9c  
650 *Methanospirillum hungatei* JF-1  
651 *Methanothermobacter marburgensis* str. Marburg

652 *Methanothermococcus okinawensis* IH1  
653 *Methanothermus fervidus* DSM 2088  
654 *Methanotorris igneus* Kol 5  
655 *Metschnikowia bicuspidata* var. *bicuspidata* NRRL YB-4993  
656 *Meyerozyma guilliermondii*  
657 *Microbotryum violaceum*  
658 *Microcebus murinus*  
659 *Micromonas pusilla* CCMP1545  
660 *Micromonas pusilla* RCC299  
661 *Microplitis demolitor*  
662 *Microsporum canis*  
663 *Microsporum canis* CBS 113480  
664 *Microsporum gypseum*  
665 *Microtus ochrogaster*  
666 *Millerozyma farinosa*  
667 *Mimulus guttatus*  
668 *Mixia osmundae* IAM 14324  
669 *Mnemiopsis leidyi*  
670 *Monacrosporium haptotylum* CBS 200.50  
671 *Monascus purpureus*  
672 *Monascus ruber* NRRL 1597  
673 *Moniliophthora perniciosa* FA553  
674 *Monocercomonoides* sp. PA  
675 *Monodelphis domestica*  
676 *Monosiga brevicollis*  
677 *Moorella thermoacetica* ATCC 39073  
678 *Morchella conica* CCBAS932  
679 *Mortierella elongata*  
680 *Mortierella verticillata* NRRL 6337  
681 *Mucor circinelloides* f. *lusitanicus* CBS 277.49  
682 *Mus musculus*

683 *Musa acuminata*  
684 *Musca domestica*  
685 *Mustela putorius furo*  
686 *Myceliophthora fergusii*  
687 *Myceliophthora sepedonium*  
688 *Myceliophthora thermophila*  
689 *Mycobacterium bovis* AF2122\_97  
690 *Mycobacterium leprae* TN  
691 *Mycoplasma mycoides* subsp. *mycoides* SC str. PG1  
692 *Mycosphaerella fijiensis*  
693 *Mycosphaerella graminicola*  
694 *Myotis brandtii*  
695 *Myotis davidii*  
696 *Myotis lucifugus*  
697 *Myriangium duriaei* CBS 260.36  
698 *Myriococcum thermophilum*  
699 *Nadsonia fulvescens* var. *elongata* DSM 6958  
700 *Naegleria fowleri*  
701 *Naegleria gruberi*  
702 *Naiadella fluitans* ATCC 64713  
703 *Nannochloropsis gaditana*  
704 *Nannospalax galili*  
705 *Nanoarchaeum equitans* Kin4-M  
706 *Nanorana parkeri*  
707 *Nasonia vitripennis*  
708 *Natrialba magadii* ATCC 43099  
709 *Natrinema pellirubrum* DSM 15624  
710 *Natronobacterium gregoryi* SP2  
711 *Natronococcus occultus* SP4  
712 *Natronomonas pharaonis* DSM 2160  
713 *Naumovozya castellii*

714 *Naumovozya dairenensis*  
715 *Nectria haematococca*  
716 *Nelumbo nucifera*  
717 *Nematocida parisii* ERTm1  
718 *Nematocida parisii* ERTm3  
719 *Nematocida* sp. 1 ERTm2  
720 *Nematocida* sp. 1 ERTm6  
721 *Nematostella vectensis*  
722 *Neofusicoccum parvum* UCRNP2  
723 *Neolamprologus brichardi*  
724 *Neolentinus lepideus*  
725 *Neosartorya fischeri* NRRL 181  
726 *Neospora caninum*  
727 *Nestor notabilis*  
728 *Neurospora crassa* OR74A  
729 *Neurospora discreta* FGSC 8579  
730 *Neurospora tetrasperma* FGSC 2508  
731 *Neurospora tetrasperma* FGSC 2509  
732 *Nicotiana benthamiana*  
733 *Nicotiana glauca*  
734 *Nicotiana tomentosiformis*  
735 *Nipponia nippon*  
736 *Nitrosopumilus maritimus* SCM1  
737 *Nomascus leucogenys*  
738 *Nosema apis* BRL 01  
739 *Nosema bombycis* CQ1  
740 *Nosema ceranae* BRL01  
741 *Notothenia coriiceps*  
742 *Obba rivulosa*  
743 *Ochotona princeps*  
744 *Octodon degus*



745 *Oculimacula yallundae*  
746 *Odobenus rosmarus*  
747 *Ogataea angusta* NCYC 495 leu1.1  
748 *Oidiodendron maius* Zn  
749 *Oikopleura dioica*  
750 *Omphalotus olearius*  
751 *Onchocerca volvulus*  
752 *Ophiobolus disseminans*  
753 *Ophiostoma piceae* UAMH 11346  
754 *Opisthocomus hoazin*  
755 *Orcinus orca*  
756 *Oreochromis niloticus*  
757 *Ornithorhynchus anatinus*  
758 *Orpinomyces* sp. C1A  
759 *Orycteropus afer* *afer*  
760 *Oryctolagus cuniculus*  
761 *Oryza barthii*  
762 *Oryza brachyantha*  
763 *Oryza glaberrima*  
764 *Oryza glumaepatula*  
765 *Oryza meridionalis*  
766 *Oryza nivara*  
767 *Oryza punctata*  
768 *Oryza rufipogon*  
769 *Oryza sativa*  
770 *Oryza sativa* Indica Group  
771 *Oryzias latipes*  
772 *Ostreococcus lucimarinus*  
773 *Ostreococcus* sp. RCC809  
774 *Ostreococcus tauri*  
775 *Otolemur garnettii*

776 *Ovis aries*  
777 *Oxytricha trifallax*  
778 *Pachysolen tannophilus* NRRL Y-2460  
779 *Pan paniscus*  
780 *Pan troglodytes*  
781 *Panicum hallii*  
782 *Panicum virgatum*  
783 *Panthera tigris altaica*  
784 *Pantholops hodgsonii*  
785 *Papio anubis*  
786 *Paracoccidioides brasiliensis* Pb01  
787 *Paracoccidioides brasiliensis* Pb03  
788 *Paracoccidioides brasiliensis* Pb18  
789 *Paramecium biaurelia*  
790 *Paramecium caudatum*  
791 *Paramecium multimicronucleatum*  
792 *Paramecium primaurelia*  
793 *Paramecium sexaurelia*  
794 *Paramecium tetraurelia*  
795 *Pararge aegeria*  
796 *Parastagonospora nodorum* SN15  
797 *Patellaria atrata*  
798 *Patiria miniata*  
799 *Paxillus involutus* ATCC 200175  
800 *Paxillus rubicundulus* Ve08.2h10  
801 *Pediculus humanus*  
802 *Pelecanus crispus*  
803 *Pelodiscus sinensis*  
804 *Penicillium bilaiae* ATCC 20851  
805 *Penicillium brevicompactum*  
806 *Penicillium brevicompactum* AgRF18

807 *Penicillium canescens* ATCC 10419  
808 *Penicillium chrysogenum*  
809 *Penicillium chrysogenum* Wisconsin 54-1255  
810 *Penicillium digitatum* PHI26  
811 *Penicillium expansum* ATCC 24692  
812 *Penicillium fellutanum* ATCC 48694  
813 *Penicillium glabrum* DAOM 239074  
814 *Penicillium janthinellum* ATCC 10455  
815 *Penicillium lanosocoeruleum* ATCC 48919  
816 *Penicillium oxalicum* 114-2  
817 *Penicillium raistrickii* ATCC 10490  
818 *Perkinsus marinus*  
819 *Peromyscus maniculatus bairdii*  
820 *Petromyzon marinus*  
821 *Phaeoacremonium aleophilum* UCRPA7  
822 *Phaeodactylum tricornutum*  
823 *Phaeodactylum tricornutum* unmapped  
824 *Phaeosphaeria nodorum*  
825 *Phaethon lepturus*  
826 *Phalacrocorax carbo*  
827 *Phanerochaete carnosae* HHB-10118-Sp  
828 *Phanerochaete chrysosporium*  
829 *Phanerochaete chrysosporium* RP-78  
830 *Phaseolus vulgaris*  
831 *Phialophora europaea* CBS 101466  
832 *Phlebia brevispora* HHB-7030 SS6  
833 *Phlebiopsis gigantea*  
834 *Phoenicopterus ruber*  
835 *Phoenix dactylifera*  
836 *Phycomyces blakesleeianus*  
837 *Phyllostachys edulis*

838 *Physcomitrella patens*  
839 *Physeter catodon*  
840 *Phytophthora capsici*  
841 *Phytophthora cinnamomi* var. *Cinnamomi*  
842 *Phytophthora infestans* T30-4  
843 *Phytophthora kernoviae*  
844 *Phytophthora lateralis* MPF4  
845 *Phytophthora parasitica*  
846 *Phytophthora parasitica* P1569  
847 *Phytophthora ramorum*  
848 *Phytophthora sojae*  
849 *Picea abies*  
850 *Picea sitchensis*  
851 *Pichia membranifaciens*  
852 *Pichia pastoris*  
853 *Pichia sorbitophila*  
854 *Pichia stipitis*  
855 *Picoides pubescens*  
856 *Picrophilus torridus* DSM 9790  
857 *Piedraia hortae*  
858 *Piloderma croceum* F 1598  
859 *Pinctada fucata*  
860 *Pinus taeda*  
861 *Piriformospora indica* DSM 11827  
862 *Piromyces* sp. E2  
863 *Pisolithus microcarpus* 441  
864 *Pisolithus tinctorius* Marx 270  
865 *Plasmodium berghei*  
866 *Plasmodium chabaudi*  
867 *Plasmodium cynomolgi*  
868 *Plasmodium falciparum*

869 *Plasmodium inui*  
870 *Plasmodium knowlesi*  
871 *Plasmodium reichenowi*  
872 *Plasmodium vinckei petteri*  
873 *Plasmodium vinckei vinckei*  
874 *Plasmodium vivax*  
875 *Plasmodium yoelii*  
876 *Plenodomus tracheiphilus* IPT5  
877 *Pleomassaria siparia*  
878 *Pleurotus ostreatus* PC15  
879 *Pleurotus ostreatus* PC9  
880 *Plicaturopsis crispa*  
881 *Plutella xylostella*  
882 *Pneumocystis jirovecii*  
883 *Pneumocystis murina* B123  
884 *Podiceps cristatus*  
885 *Podospora anserina*  
886 *Podospora anserina* S mat+  
887 *Poecilia formosa*  
888 *Poecilia reticulata*  
889 *Polychaeton citri*  
890 *Polyporus arcularius*  
891 *Polysphondylium pallidum*  
892 *Pongo abelii*  
893 *Populus euphratica*  
894 *Populus trichocarpa*  
895 *Porphyridium purpureum*  
896 *Postia placenta* MAD 698-R  
897 *Postia placenta* MAD-698-R-SB12  
898 *Primula veris*  
899 *Pristionchus pacificus*

900 *Procavia capensis*  
901 *Prunus mume*  
902 *Prunus persica*  
903 *Pseudo-nitzschia multiseriis*  
904 *Pseudomonas aeruginosa* PAO1  
905 *Pseudopocetes humilis*  
906 *Pseudozyma antarctica* T-34  
907 *Pseudozyma brasiliensis*  
908 *Pseudozyma flocculosa*  
909 *Pseudozyma hubeiensis* SY62  
910 *Pterocles gutturalis*  
911 *Pteropus alecto*  
912 *Pteropus vampyrus*  
913 *Puccinia graminis*  
914 *Puccinia graminis* f. sp. *tritici* 04KEN156\_4  
915 *Puccinia striiformis*  
916 *Puccinia striiformis* f. sp. *tritici* PST-130  
917 *Puccinia triticina*  
918 *Punctularia strigosozonata*  
919 *Pundamilia nyererei*  
920 *Pycnoporus coccineus*  
921 *Pycnoporus coccineus* BRFM310  
922 *Pygoscelis adeliae*  
923 *Pyrenophora teres* f. *teres*  
924 *Pyrenophora tritici-repentis*  
925 *Pyrobaculum arsenaticum* DSM 13514  
926 *Pyrococcus yayanosii* CH1  
927 *Pyrolobus fumarii* 1A  
928 *Pyronema confluens*  
929 *Pyronema confluens* CBS100304  
930 *Pyropia yezoensis*

- 931 *Pyrus x bretschneideri*
- 932 *Pythium aphanidermatum* DAOM BR444
- 933 *Pythium arrhenomanes* ATCC 12531
- 934 *Pythium irregulare* DAOM BR486
- 935 *Pythium iwayamai* DAOM BR242034
- 936 *Pythium ultimum*
- 937 *Pythium ultimum* var. *sporangiiferum* BR650
- 938 *Pythium vexans* DAOM BR484
- 939 *Python bivittatus*
- 940 *Ramaria acris* UT-36052-T
- 941 *Rasamsonia byssochlamydoides*
- 942 *Rattus norvegicus*
- 943 *Reticulomyxa filosa*
- 944 *Rhinopithecus roxellana*
- 945 *Rhipicephalus pulchellus*
- 946 *Rhizoctonia solani* AG-1 IB
- 947 *Rhizomucor miehei*
- 948 *Rhizomucor pusillus*
- 949 *Rhizophagus irregularis* DAOM 181602
- 950 *Rhizopogon vinicolor* AM-OR11-026
- 951 *Rhizopus delemar* RA 99-880
- 952 *Rhizopus microsporus* var. *chinensis* CCTCC M201021
- 953 *Rhizopus microsporus* var. *microsporus*
- 954 *Rhodnius prolixus*
- 955 *Rhodobacter sphaeroides* 2.4.1
- 956 *Rhodopirellula baltica* SH 1
- 957 *Rhodospirillum rubrum* ATCC 11170
- 958 *Rhodosporidium toruloides* MTCC 457
- 959 *Rhodotorula graminis* WP1
- 960 *Rhodotorula minuta* MCA 4210
- 961 *Rhytidhysterium rufulum*

962 *Ricinus communis*  
963 *Rickenella mellea*  
964 *Rickettsia prowazekii* str. Madrid E  
965 *Rozella allomycis* CSF55  
966 *Saccharata proteae* CBS 121410  
967 *Saccharomyces arboricola*  
968 *Saccharomyces bayanus*  
969 *Saccharomyces bayanus* var. *uvarum*  
970 *Saccharomyces castelli*  
971 *Saccharomyces castelii*  
972 *Saccharomyces cerevisiae* M3707  
973 *Saccharomyces cerevisiae* M3836  
974 *Saccharomyces cerevisiae* M3837  
975 *Saccharomyces cerevisiae* M3838  
976 *Saccharomyces cerevisiae* M3839  
977 *Saccharomyces cerevisiae* S288C  
978 *Saccharomyces cerevisiae* YB210  
979 *Saccharomyces kudriavzevii*  
980 *Saccharomyces kudriavzevii* ZP591  
981 *Saccharomyces mikatae*  
982 *Saccharomyces paradoxus*  
983 *Saccoglossus kowalevskii*  
984 *Saimiri boliviensis*  
985 *Saitoella complicata* NRRL Y-17804  
986 *Salinarchaeum* sp. Harcht-Bsk1  
987 *Salinibacter ruber* DSM 13855  
988 *Salix purpurea*  
989 *Salmonella enterica* subsp. *enterica* serovar *Typhi* str. CT18  
990 *Salpingoeca* sp. ATCC 50818  
991 *Saprolegnia declina* VS20  
992 *Saprolegnia parasitica* cbs 223.65



- 993 *Sarcophilus harrisii*
- 994 *Schistosoma haematobium*
- 995 *Schistosoma japonicum*
- 996 *Schistosoma mansoni*
- 997 *Schizochytrium aggregatum* ATCC 28209
- 998 *Schizochytrium limacinum* ATCC MYA-1381
- 999 *Schizophyllum commune* H4-8
- 1000 *Schizophyllum commune* Loenen D
- 1001 *Schizophyllum commune* Tattone D
- 1002 *Schizopora paradoxa*
- 1003 *Schizosaccharomyces cryophilus*
- 1004 *Schizosaccharomyces japonicus*
- 1005 *Schizosaccharomyces octosporus*
- 1006 *Schizosaccharomyces pombe*
- 1007 *Scleroderma citrinum* Foug A
- 1008 *Sclerotinia sclerotiorum*
- 1009 *Scytalidium thermophilum*
- 1010 *Sebacina vermifera* MAFF 305830
- 1011 *Selaginella moellendorffii*
- 1012 *Septoria musiva* SO2202
- 1013 *Septoria populicola*
- 1014 *Serinus canaria*
- 1015 *Serpula lacrymans* var. *shastensis* SHA21-2
- 1016 *Serpula lacrymans* var. *lacrymans* S7.3
- 1017 *Serpula lacrymans* var. *lacrymans* S7.9
- 1018 *Sesamum indicum*
- 1019 *Setaria italica*
- 1020 *Setosphaeria turcica* Et28A
- 1021 *Shewanella oneidensis* MR-1
- 1022 *Shigella dysenteriae* Sd197
- 1023 *Shigella flexneri* 2a str. 301

1024 *Sistotremastrum niveocreameum* HHB9708  
1025 *Sistotremastrum suecicum*  
1026 *Sodiomyces alkalinus*  
1027 *Solanum lycopersicum*  
1028 *Solanum pimpinellifolium*  
1029 *Solanum tuberosum*  
1030 *Solenopsis invicta*  
1031 *Sordaria macrospora*  
1032 *Sorex araneus*  
1033 *Sorghum bicolor*  
1034 *Spathaspora passalidarum* NRRL Y-27907  
1035 *Sphaerobolus stellatus*  
1036 *Sphaeroforma arctica* jp610  
1037 *Spirodela polyrhiza*  
1038 *Spizellomyces punctatus* daom br117  
1039 *Sporisorium reilianum* SRZ2  
1040 *Sporobolomyces linderiae* CBS 7893  
1041 *Sporobolomyces roseus*  
1042 *Sporormia fimetaria*  
1043 *Sporothrix schenckii*  
1044 *Spraguea lophii*  
1045 *Staphylothermus hellenicus* DSM 12710  
1046 *Stegastes partitus*  
1047 *Stereum hirsutum* FP-91666 SS1  
1048 *Streptococcus pneumoniae* R6  
1049 *Streptococcus suis* BM407  
1050 *Strigamia maritima*  
1051 *Strigomonas culicis*  
1052 *Strongylocentrotus purpuratus*  
1053 *Strongyloides ratti*  
1054 *Struthio camelus*

1055 *Stylonychia lemnae*  
1056 *Suillus brevipes*  
1057 *Suillus luteus* UH-Slu-Lm8-n1  
1058 *Sulfolobus islandicus* M.14.25  
1059 *Sus scrofa*  
1060 *Symbiodinium minutum*  
1061 *Symbiotaphrina kochii*  
1062 *Taenia solium*  
1063 *Taeniopygia guttata*  
1064 *Takifugu rubripes*  
1065 *Talaromyces aculeatus* ATCC 10409  
1066 *Talaromyces marneffeii* ATCC 18224  
1067 *Talaromyces stipitatus* ATCC 10500  
1068 *Taphrina deformans*  
1069 *Tarenaya hassleriana*  
1070 *Tarsius syrichta*  
1071 *Tauraco erythrolophus*  
1072 *Terfezia boudieri* S1  
1073 *Tetrahymena borealis*  
1074 *Tetrahymena ellioti*  
1075 *Tetrahymena malaccensis*  
1076 *Tetrahymena thermophila macronucleus*  
1077 *Tetrahymena thermophila micronucleus*  
1078 *Tetranychus urticae*  
1079 *Tetraodon nigroviridis*  
1080 *Tetrapisispora blattae*  
1081 *Tetrapisispora phaffii*  
1082 *Thalassiosira oceanica*  
1083 *Thalassiosira pseudonana*  
1084 *Thecamonas trahens* ATCC 50062  
1085 *Theileria annulata*

1086 *Theileria parva*  
1087 *Theobroma cacao*  
1088 *Thermanaerovibrio acidaminovorans* DSM 6589  
1089 *Thermoascus aurantiacus*  
1090 *Thermoascus crustaceus*  
1091 *Thermococcus barophilus* MP  
1092 *Thermodesulfovibrio yellowstonii* DSM 11347  
1093 *Thermofilum pendens* Hrk 5  
1094 *Thermogladius cellulolyticus* 1633  
1095 *Thermomyces dupontii*  
1096 *Thermomyces lanuginosus*  
1097 *Thermoplasma acidophilum* DSM 1728  
1098 *Thermoplasmatales archaeon* BRNA1  
1099 *Thermoproteus uzoniensis* 768-20  
1100 *Thermosphaera aggregans* DSM 11486  
1101 *Thermosynechococcus elongatus* BP-1  
1102 *Thermotoga maritima* MSB8  
1103 *Thielavia antarctica* CBS 123565  
1104 *Thielavia appendiculata* CBS 731.68  
1105 *Thielavia arenaria* CBS 508.74  
1106 *Thielavia australiensis*  
1107 *Thielavia hyrcaniae* CBS 757.83  
1108 *Thielavia terrestris*  
1109 *Thraustotheca clavata*  
1110 *Tilletiaria anomala* UBC 951  
1111 *Tinamus guttatus*  
1112 *Torulasporea delbrueckii*  
1113 *Toxocara canis*  
1114 *Toxoplasma gondii*  
1115 *Trachipleistophora hominis*  
1116 *Trametes cinnabarina* BRFM137

1117 *Trametes sanguinea*  
1118 *Trametes versicolor*  
1119 *Trematosphaeria pertusa* CBS 122368  
1120 *Tremella mesenterica*  
1121 *Tribolium castaneum*  
1122 *Trichaptum abietinum*  
1123 *Trichechus manatus latirostris*  
1124 *Trichinella spiralis*  
1125 *Trichoderma asperellum* CBS 433.97  
1126 *Trichoderma atroviride*  
1127 *Trichoderma citrinoviride*  
1128 *Trichoderma harzianum* CBS 226.95  
1129 *Trichoderma longibrachiatum* ATCC 18648  
1130 *Trichoderma reesei*  
1131 *Trichoderma reesei* RUT C-30  
1132 *Trichoderma virens*  
1133 *Trichoderma virens* Gv29-8  
1134 *Tricholoma matsutake* 945  
1135 *Trichomonas vaginalis* G3  
1136 *Trichophyton equinum*  
1137 *Trichophyton interdigitale* H6  
1138 *Trichophyton interdigitale* MR816  
1139 *Trichophyton rubrum* CBS 118892  
1140 *Trichophyton rubrum* D6  
1141 *Trichophyton rubrum* MR1448  
1142 *Trichophyton rubrum* MR1459  
1143 *Trichophyton rubrum* MR850  
1144 *Trichophyton tonsurans*  
1145 *Trichophyton verrucosum* HKI 0517  
1146 *Trichoplax adhaerens*  
1147 *Trichosporon asahii* var. *asahii* CBS 2479

1148 *Trichosporon asahii* var. *asahii* CBS 8904  
1149 *Trichosporon oleaginosus*  
1150 *Trichuris muris*  
1151 *Triticum aestivum*  
1152 *Triticum urartu*  
1153 *Tritirachium* sp. CBS 265.96  
1154 *Trypanosoma brucei*  
1155 *Trypanosoma congolense*  
1156 *Trypanosoma cruzi*  
1157 *Trypanosoma vivax*  
1158 *Trypethelium eluteriae*  
1159 *Tuber melanosporum*  
1160 *Tulasnella calospora* AL13\_4D  
1161 *Tupaia belangeri*  
1162 *Tupaia chinensis*  
1163 *Tursiops truncatus*  
1164 *Tyto alba*  
1165 *Umbelopsis ramanniana* AG  
1166 *Uncinocarpus reesii* 1704  
1167 *Ursus maritimus*  
1168 *Ustilago hordei*  
1169 *Ustilago maydis*  
1170 *Vaccinium corymbosum*  
1171 *Vanderwaltozyma polyspora*  
1172 *Vavraia culicis floridensis*  
1173 *Verticillium alfalfae* VaMs.102  
1174 *Verticillium dahliae*  
1175 *Vibrio cholerae* O1 biovar El Tor str. N16961  
1176 *Vibrio fischeri* ES114  
1177 *Vicugna pacos*  
1178 *Vitis vinifera*

1179 *Vitrella brassicaformis* CCMP3155  
1180 *Vittaforma corneae* ATCC 50505  
1181 *Volvariella volvacea* V23  
1182 *Volvox carteri*  
1183 *Vulcanisaeta distributa* DSM 14429  
1184 *Wallemia ichthyophaga* EXF-994  
1185 *Wallemia sebi*  
1186 *Wickerhamomyces anomalus* NRRL Y-366-8  
1187 *Wilcoxina mikolae* CBS 423.85  
1188 *Wolfiporia cocos* MD-104 SS10  
1189 *Wuchereria bancrofti*  
1190 *Xanthomonas campestris* pv. *campestris* str. ATCC 33913  
1191 *Xanthoria parietina* 46-1-SA22  
1192 *Xenopus laevis*  
1193 *Xenopus tropicalis*  
1194 *Xiphophorus maculatus*  
1195 *Xylona heveae* TC161  
1196 *Yarrowia lipolytica* CLIB122  
1197 *Yersinia enterocolitica* subsp. *enterocolitica* 8081  
1198 *Yersinia pestis* CO92  
1199 *Zasmidium cellare* ATCC 36951  
1200 *Zea mays*  
1201 *Zonotrichia albicollis*  
1202 *Zopfia rhizophila*  
1203 *Zygosaccharomyces bailii* CLIB 213  
1204 *Zygosaccharomyces bailii* ISA1307  
1205 *Zygosaccharomyces rouxii*  
1206 *Zymoseptoria tritici*
